# Supplementary material
Source: PubMed Central journal article supplement (PMC7209776)
Supplement: supplementary_table_si_dez170.pdf [file supplementary_table_si_dez170.pdf]

**Supplementary Table S1** Sensitivity analyses of the associations between 25(OH)D and time to pregnancy among participants from the Time to Conceive cohort.<sup>a</sup>

| FR (95% CI)                                                                       |                   |
|-----------------------------------------------------------------------------------|-------------------|
| Results presented in Table II for reference (522 women)                           |                   |
| <20 ng/ml                                                                         | 0.55 (0.23, 1.32) |
| 20–30                                                                             | 1.17 (0.89, 1.53) |
| 30–40                                                                             | I                 |
| 40–50                                                                             | 0.97 (0.73, 1.31) |
| ≥50                                                                               | 1.35 (0.95, 1.91) |
| Using cycle-specific estimate of 25(OH)D (509 women)                              |                   |
| <20 ng/ml                                                                         | 0.54 (0.22, 1.28) |
| 20–30                                                                             | 1.02 (0.77, 1.35) |
| 30–40                                                                             | I                 |
| 40–50                                                                             | 0.95 (0.71, 1.27) |
| ≥50                                                                               | 1.24 (0.85, 1.82) |
| Women whose blood draw occurred in the first six cycles of attempt (515 women)    |                   |
| <20 ng/ml                                                                         | 0.68 (0.34, 1.36) |
| 20–30                                                                             | 1.13 (0.88, 1.45) |
| 30–40                                                                             | I                 |
| 40–50                                                                             | 0.96 (0.73, 1.26) |
| ≥50                                                                               | 1.30 (0.94, 1.82) |
| Limited to cycles that occurred within three cycles of the blood draw (522 women) |                   |
| <20 ng/ml                                                                         | 0.55 (0.23, 1.31) |
| 20–30                                                                             | 1.16 (0.89, 1.52) |
| 30–40                                                                             | I                 |
| 40–50                                                                             | 0.98 (0.73, 1.31) |
| ≥50                                                                               | 1.36 (0.95, 1.93) |
| Limited to women with $0.7 < \text{AMH} \leq 7.5$ ng/ml (408 women)               |                   |
| <20 ng/ml                                                                         | 0.31 (0.08, 1.22) |
| 20–30                                                                             | 1.22 (0.90, 1.64) |
| 30–40                                                                             | I                 |
| 40–50                                                                             | 1.02 (0.73, 1.42) |
| ≥50                                                                               | 1.32 (0.89, 1.95) |

*Continued*

**Supplementary Table S1** *Continued*

| <b>FR (95% CI)</b>                  |                   |
|-------------------------------------|-------------------|
| Adjusting for gravidity (522 women) |                   |
| <20 ng/ml                           | 0.61 (0.25, 1.46) |
| 20–30                               | 1.19 (0.91, 1.56) |
| 30–40                               | 1                 |
| 40–50                               | 1.00 (0.75, 1.34) |
| ≥50                                 | 1.50 (1.05, 2.15) |
| Adjusting for exercise (514 women)  |                   |
| <20 ng/ml                           | 0.75 (0.40, 1.43) |
| 20–30                               | 1.09 (0.86, 1.40) |
| 30–40                               | 1                 |
| 40–50                               | 0.89 (0.67, 1.16) |
| ≥50                                 | 1.27 (0.92, 1.76) |

<sup>a</sup>Adjusted for age, race, education and fertile window intercourse.
